# Supplementary material for: Instability of Acylcarnitines in Stored Dried Blood Spots: The Impact on Retrospective Analysis of Biomarkers for Inborn Errors of Metabolism
Source: PubMed Central journal article supplement (PMC7712882; doi:10.3390/ijns6040083), 2020-11-02
Supplement: IJNS-06-00083-s001.pdf [file IJNS-06-00083-s001.pdf]

**Table S1. The inter-assay precision per acylcarnitine species.** Calculated from quality control samples (n = 30 in ten experiments). The coefficients of variation (CV) were calculated as the ratio of the standard deviation to the mean. For C5:1-, C12OH-, C14OH-, C18OH-, C18DC-, C24- and C26-carnitine, concentrations were below the limit of detection (shown as not detectable: ND). Acylcarnitines in the low or high QC samples with concentrations below the limit of quantification are in *italic*.

| Parameter        | Low QC                        |             |              | High QC                       |             |              |
|------------------|-------------------------------|-------------|--------------|-------------------------------|-------------|--------------|
|                  | Average ( $\mu\text{mol/L}$ ) | SD          | CV (%)       | Average ( $\mu\text{mol/L}$ ) | SD          | CV (%)       |
| <b>Total</b>     | 48.75                         | 3.38        | 6.9          | 69.02                         | 4.68        | 6.8          |
| <b>C0</b>        | 25.50                         | 2.09        | 8.2          | 29.84                         | 2.38        | 8.0          |
| <b>C2</b>        | 16.74                         | 1.06        | 6.3          | 21.49                         | 1.36        | 6.3          |
| <b>C3</b>        | 1.94                          | 0.13        | 6.6          | 6.17                          | 0.36        | 5.9          |
| <b>C4</b>        | 0.18                          | 0.02        | 10.6         | 0.40                          | 0.04        | 9.6          |
| <b>C5:1</b>      | ND                            |             |              | <i>0.01</i>                   | <i>0.01</i> | <i>161.3</i> |
| <b>C5</b>        | 0.08                          | 0.01        | 15.4         | 0.24                          | 0.03        | 11.8         |
| <b>C6</b>        | 0.02                          | 0.00        | 18.5         | 0.28                          | 0.03        | 10.4         |
| <b>C8</b>        | <i>0.04</i>                   | <i>0.01</i> | <i>22.6</i>  | 1.94                          | 0.17        | 8.6          |
| <b>C10:1</b>     | <i>0.02</i>                   | <i>0.01</i> | <i>38.4</i>  | 0.36                          | 0.04        | 10.8         |
| <b>C10</b>       | 0.05                          | 0.01        | 18.9         | 0.48                          | 0.04        | 8.1          |
| <b>C12:1</b>     | <i>0.01</i>                   | <i>0.01</i> | <i>191.8</i> | 0.09                          | 0.02        | 17.4         |
| <b>C12</b>       | <i>0.05</i>                   | <i>0.01</i> | <i>27.8</i>  | 0.29                          | 0.03        | 10.8         |
| <b>C14:1</b>     | <i>0.05</i>                   | <i>0.01</i> | <i>23.1</i>  | 0.37                          | 0.04        | 9.7          |
| <b>C14</b>       | 0.15                          | 0.02        | 14.2         | 0.30                          | 0.02        | 7.7          |
| <b>C16:1</b>     | 0.08                          | 0.01        | 14.2         | 0.18                          | 0.02        | 10.9         |
| <b>C16</b>       | 0.96                          | 0.08        | 7.9          | 1.14                          | 0.08        | 7.1          |
| <b>C18:2</b>     | 0.31                          | 0.03        | 10.2         | 0.42                          | 0.04        | 9.0          |
| <b>C18:1</b>     | 1.26                          | 0.11        | 8.9          | 1.73                          | 0.14        | 8.1          |
| <b>C18</b>       | 0.49                          | 0.05        | 9.8          | 1.00                          | 0.09        | 8.8          |
| <b>C4OH+C3DC</b> | <i>0.10</i>                   | <i>0.06</i> | <i>61.6</i>  | <i>0.20</i>                   | <i>0.14</i> | <i>70.4</i>  |
| <b>C5OH+C4DC</b> | 0.32                          | 0.03        | 10.4         | 0.51                          | 0.07        | 13.3         |
| <b>C5DC</b>      | <i>0.05</i>                   | <i>0.12</i> | <i>231.7</i> | 0.92                          | 0.16        | 17.8         |
| <b>C6DC</b>      | <i>0.01</i>                   | <i>0.01</i> | <i>141.2</i> | 0.08                          | 0.01        | 17.4         |
| <b>C12OH</b>     | ND                            |             |              | ND                            |             |              |
| <b>C14OH</b>     | ND                            |             |              | ND                            |             |              |
| <b>C16OH</b>     | <i>0.01</i>                   | <i>0.01</i> | <i>120.5</i> | <i>0.01</i>                   | <i>0.01</i> | <i>141.1</i> |
| <b>C18:1OH</b>   | <i>0.01</i>                   | <i>0.01</i> | <i>136.6</i> | <i>0.02</i>                   | <i>0.01</i> | <i>43.9</i>  |
| <b>C18OH</b>     | ND                            |             |              | ND                            |             |              |
| <b>C16DC</b>     | <i>0.02</i>                   | <i>0.01</i> | <i>51.4</i>  | <i>0.03</i>                   | <i>0.01</i> | <i>28.8</i>  |
| <b>C18DC</b>     | ND                            |             |              | ND                            |             |              |
| <b>C24</b>       | ND                            |             |              | <i>0.01</i>                   | <i>0.01</i> | <i>63.4</i>  |
| <b>C26</b>       | ND                            |             |              | <i>0.01</i>                   | <i>0.01</i> | <i>95.0</i>  |

**Table S2. The estimated decay rates of free carnitine and acylcarnitine species upon long-term storage.** Estimated decay rates and percent decays for carnitine and the acylcarnitine concentrations with a significant trend upon storage duration, as determined by Jonckheere’s trend test. For free carnitine, the trend type was defined as polynomial trend, whereas for C2- and C3-carnitine the trend appeared exponential. For the remaining acylcarnitine species, the trend type was defined as linear. Abbreviation: ND, not determined.

| Parameter        | Estimated annual decay rate<br>( $\mu\text{mol/L}$ (95% CI)) | Estimated annual percent decay<br>from 2017 (% (95% CI)) | Estimated percent decay<br>2017 – 2013 (%(95% CI)) |
|------------------|--------------------------------------------------------------|----------------------------------------------------------|----------------------------------------------------|
| <b>C0</b>        | ND                                                           | ND                                                       | -20.0%                                             |
| <b>C2</b>        | ND                                                           | ND                                                       | 84.4%                                              |
| <b>C3</b>        | ND                                                           | ND                                                       | 65.3%                                              |
| <b>C4</b>        | 0.010 (0.006 – 0.014)                                        | 6.7% (4.3 – 9.1 %)                                       | 26.7% (17.1 – 36.3%)                               |
| <b>C5</b>        | 0.005 (0.003 – 0.008)                                        | 5.5% (3.2 – 7.7%)                                        | 21.8% (12.7 – 30.9%)                               |
| <b>C6</b>        | 0.004 (0.004 – 0.005)                                        | 20.8% (17.8 – 23.9%)                                     | 83.4% (71.1 – 95.6%)                               |
| <b>C8</b>        | 0.002 (0.001 – 0.003)                                        | 6.0% (3.5 – 8.5%)                                        | 24.0% (13.9 – 34.1%)                               |
| <b>C10:1</b>     | 0.002 (0.002 – 0.003)                                        | 7.6% (5.1 – 10.1%)                                       | 30.4% (20.4 – 40.4%)                               |
| <b>C10</b>       | 0.004 (0.002 – 0.005)                                        | 7.1% (5.0 – 9.2%)                                        | 28.4% (19.9 – 36.8%)                               |
| <b>C12:1</b>     | 0.003 (0.002 – 0.004)                                        | 10.4% (5.9 – 14.9%)                                      | 41.5% (23.4 – 59.7%)                               |
| <b>C12</b>       | 0.006 (0.004 – 0.007)                                        | 6.3% (4.5 – 8.1%)                                        | 25.2% (17.8 – 32.5%)                               |
| <b>C14:1</b>     | 0.007 (0.005 – 0.009)                                        | 7.6% (5.7 – 9.5%)                                        | 30.4% (22.8 – 37.9%)                               |
| <b>C14</b>       | 0.016 (0.011 – 0.022)                                        | 5.8% (3.8 – 7.7%)                                        | 23.1% (15.2 – 30.9%)                               |
| <b>C16:1</b>     | 0.009 (0.006 – 0.012)                                        | 9.4% (6.5 – 12.4%)                                       | 37.7% (26.0 – 49.5%)                               |
| <b>C16</b>       | 0.158 (0.114 – 0.202)                                        | 6.9% (5.0 – 8.8%)                                        | 27.6% (20.0 – 35.2%)                               |
| <b>C18:2</b>     | 0.019 (0.014 – 0.024)                                        | 9.5% (11.8 – 7.1%)                                       | 38.0% (47.4 – 28.6%)                               |
| <b>C18:1</b>     | 0.116 (0.095 – 0.137)                                        | 8.6% (7.1 – 10.2%)                                       | 34.6% (28.3 – 40.9%)                               |
| <b>C18</b>       | 0.062 (0.050 – 0.073)                                        | 8.5% (6.9 – 10.2%)                                       | 34.2% (27.6 – 40.7%)                               |
| <b>C5OH+C4DC</b> | 0.024 (0.021 – 0.028)                                        | 15.2% (13.3 – 17.2)                                      | 60.9% (53.1 – 68.8%)                               |
| <b>C18:1OH</b>   | 0.003 (0.003 – 0.004)                                        | 15.4% (18.1 – 12.6%)                                     | 61.4% (72.3 – 50.6%)                               |
| <b>C16DC</b>     | 0.003 (0.003 – 0.004)                                        | 11.3% (9.3 – 13.4%)                                      | 45.3% (37.0 – 53.5%)                               |
